# Supplementary material for: Functionalization of carbon nanotubes via Birch reduction chemistry for selective loading of CuO nanosheets
Source: Royal Society of Chemistry journal article supplement (doi:10.1039/c5nj00283d), 2015-01-01
Supplement: c5nj00283d1.pdf [file c5nj00283d1.pdf]

## Supporting Information:

# Functionalization of Carbon Nanotubes via the Birch Reduction Chemistry for Selectively Loading of CuO Nanosheets

Huiting Sun,<sup>a</sup> Xiaoping Song,<sup>a</sup> Minwei Xu,<sup>\*a, b</sup> Yin Zhang,<sup>a</sup> Wenxiu Que<sup>b</sup> and Sen Yang<sup>\*a</sup>

<sup>a</sup> MOE Key Laboratory for Nonequilibrium Synthesis and Modulation of Condensed Matter, School of Science, Xi'an Jiaotong University, Xi'an, 710049, China.

<sup>b</sup> Electronic Materials Research Laboratory, International Center for Dielectric Research, Xi'an Jiaotong University, Xi'an 710049, China.

\*Corresponding author, E-mail: [tery@stu.xjtu.edu.cn](mailto:tery@stu.xjtu.edu.cn), [yangsen@mail.xjtu.edu.cn](mailto:yangsen@mail.xjtu.edu.cn)

## SI-1

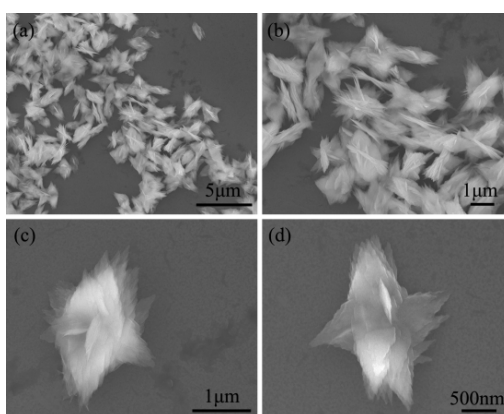

Figure S1 SEM images of pure CuO nanosheets without the introduction of CNTs

## SI-2

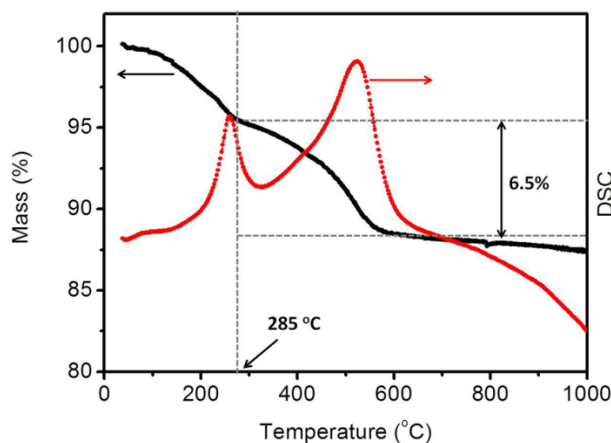

Figure S2 TG and DSC curves of CuO/CNT hybrids in air atmosphere

SI-3

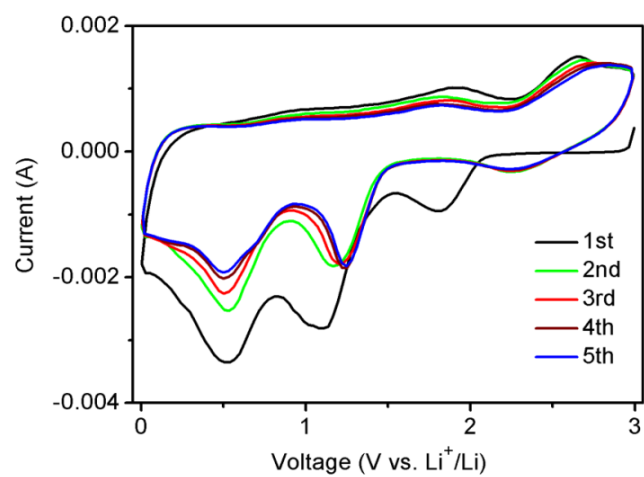

Figure S3 The first five cyclic voltammogram curves of CuO/CNT hybrids

SI-4

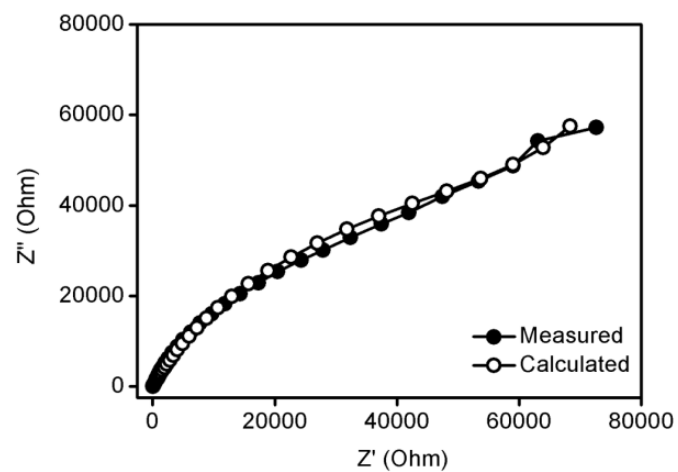

Figure S4 Nyquist plots of the pure CuO nanosheets.
